# Supplementary material for: Genomic Characterization of Aeromonas veronii Provides Insights into Taxonomic Assignment and Reveals Widespread Virulence and Resistance Genes throughout the World
Source: MDPI journal article supplement (doi:10.3390/antibiotics12061039), 2023-06-11
Supplement: s1 [file s1]

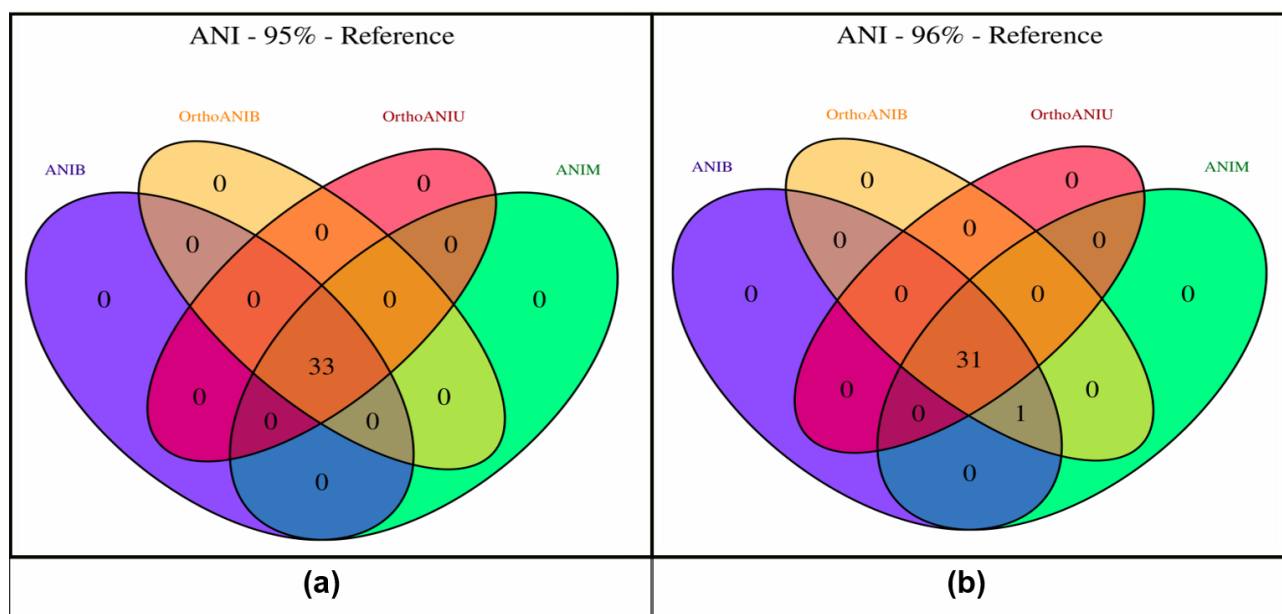

**Figure S2:** Venn diagrams illustrating the number of genomes ranked with the reference for the four methods for estimating average nucleotide identity according to the cutoff points tested: a) cut-off point equal to 95%; b) cut-off point equal to 96%. The figure was plotted with the R language (Available online: <https://cran.r-project.org/>, accessed on 3 January 2022) using the VennDiagram package (Available online: <https://www.rdocumentation.org/packages/VennDiagram/versions/1.7.3/topics/venn.diagram>, accessed on 23 August 2022).

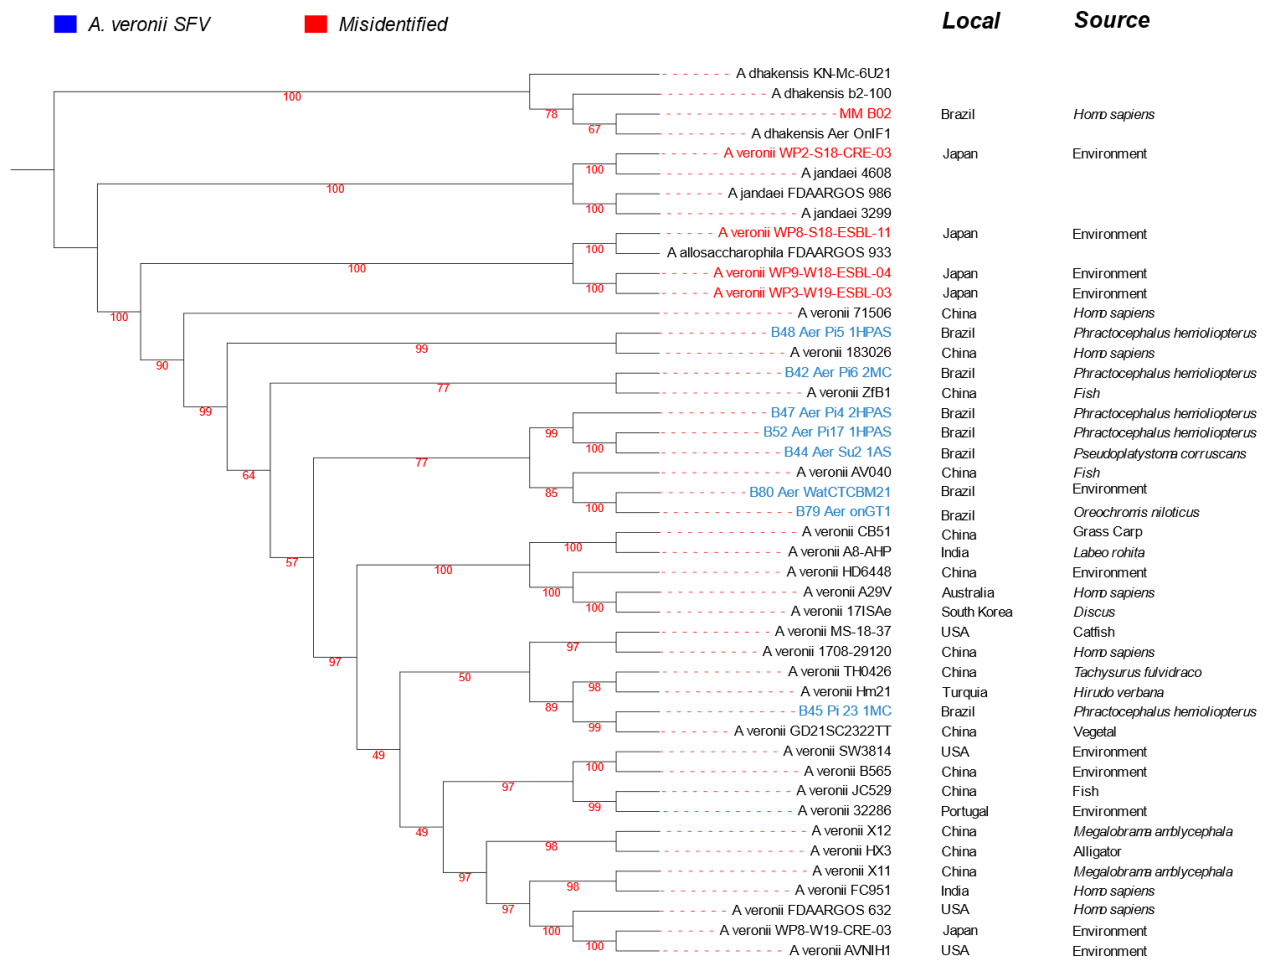

**Figure S3:** Phylogeny of SNPs from the core genome including bootstrap values (in red), sample location and isolation source. Misidentified isolates in red; SFV isolates of *A. veronii* in blue. The tree was edited using iTOL (Available online: <https://itol.embl.de/>, accessed on 15 August 2022) and host and isolation information was added using inkscape (Available online: <https://inkscape.org/pt-br/>, accessed on 14 October 2022).

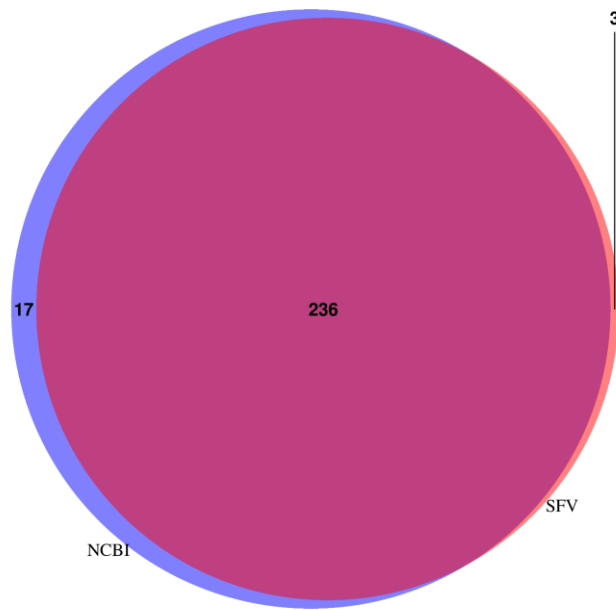

**Figure S4:** Venn Diagram illustrating the amount of virulence genes shared between SFV genomes and NCBI genomes, as well as genes particular to the two groups. The figure was plotted with the R language (Available online: <https://cran.r-project.org/>, accessed on 3 January 2022) using the VennDiagram package (Available online: <https://www.rdocumentation.org/packages/VennDiagram/versions/1.7.3/topics/venn.diagram>, accessed on 23 August 2022).

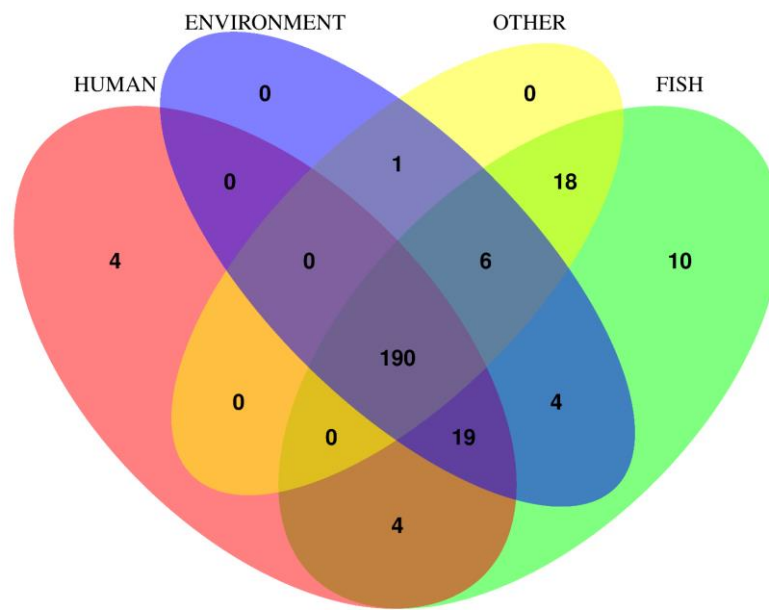

**Figure S5:** Venn Diagram illustrating the amount of genes shared between isolates from different isolation sources, as well as those that are unique to each. The figure was plotted with the R language (Available online: <https://cran.r-project.org/>, accessed on 3 January 2022) using the VennDiagram package (Available online: <https://www.rdocumentation.org/packages/VennDiagram/versions/1.7.3/topics/venn.diagram>, accessed on 23 August 2022).

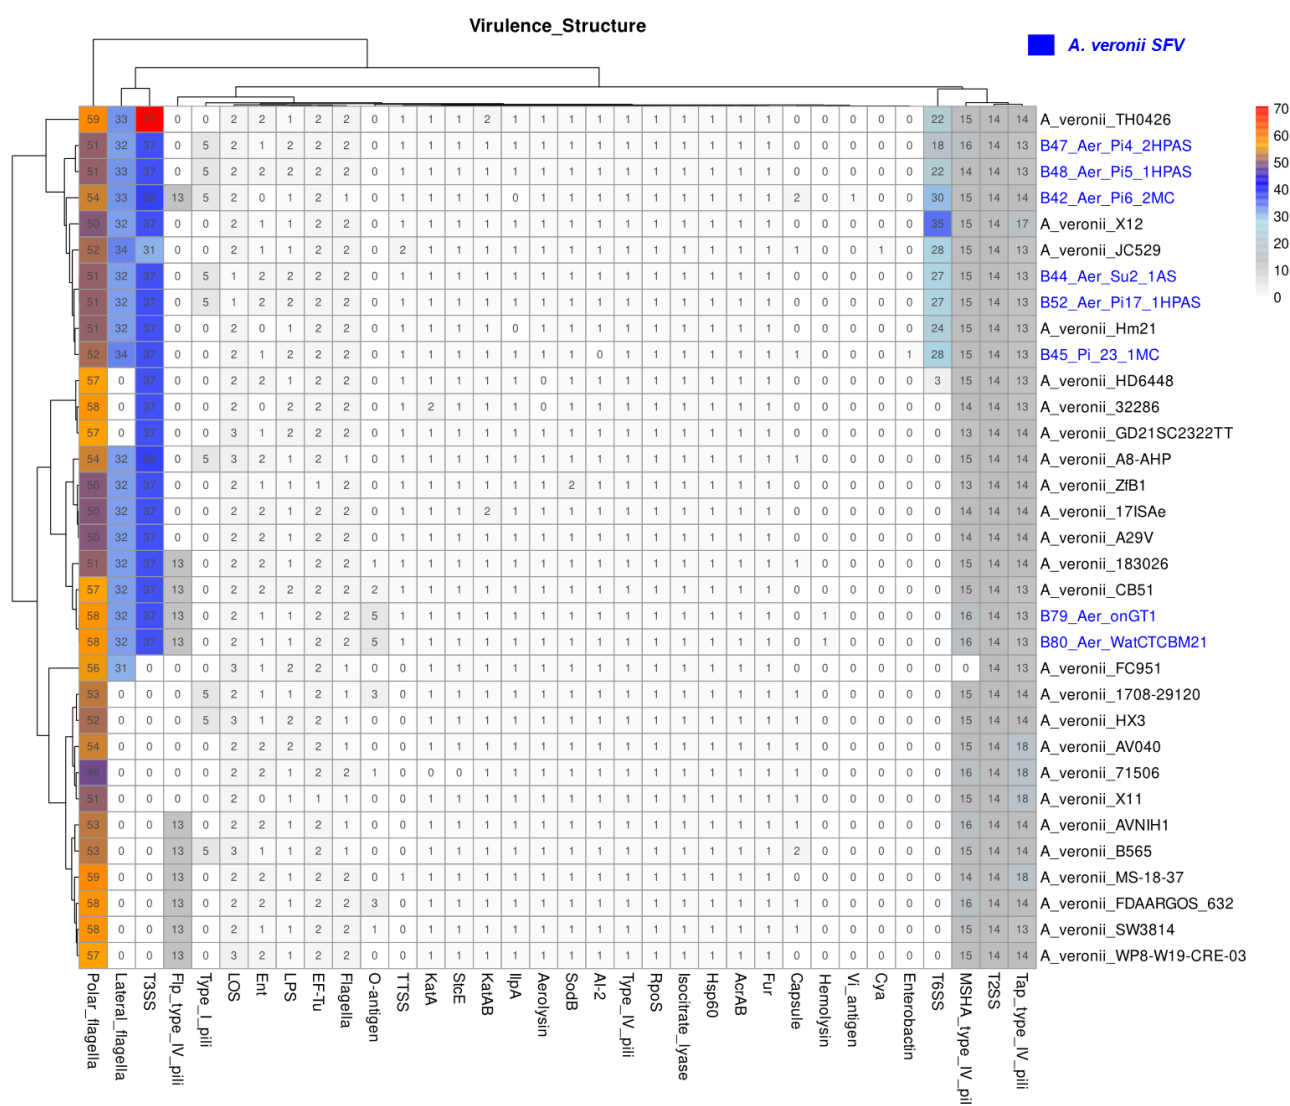

**Figure S6:** Amount of structure genes and virulence-related elements in each *Aeromonas veronii* isolate. SFV isolates highlighted in blue. The figure was plotted using R (Available online: <https://cran.r-project.org/>, accessed on 3 January 2022) with the package Pheatmap (Available online: <https://www.rdocumentation.org/packages/pheatmap/versions/1.0.12/topics/pheatmap>, accessed on 30 August 2022).

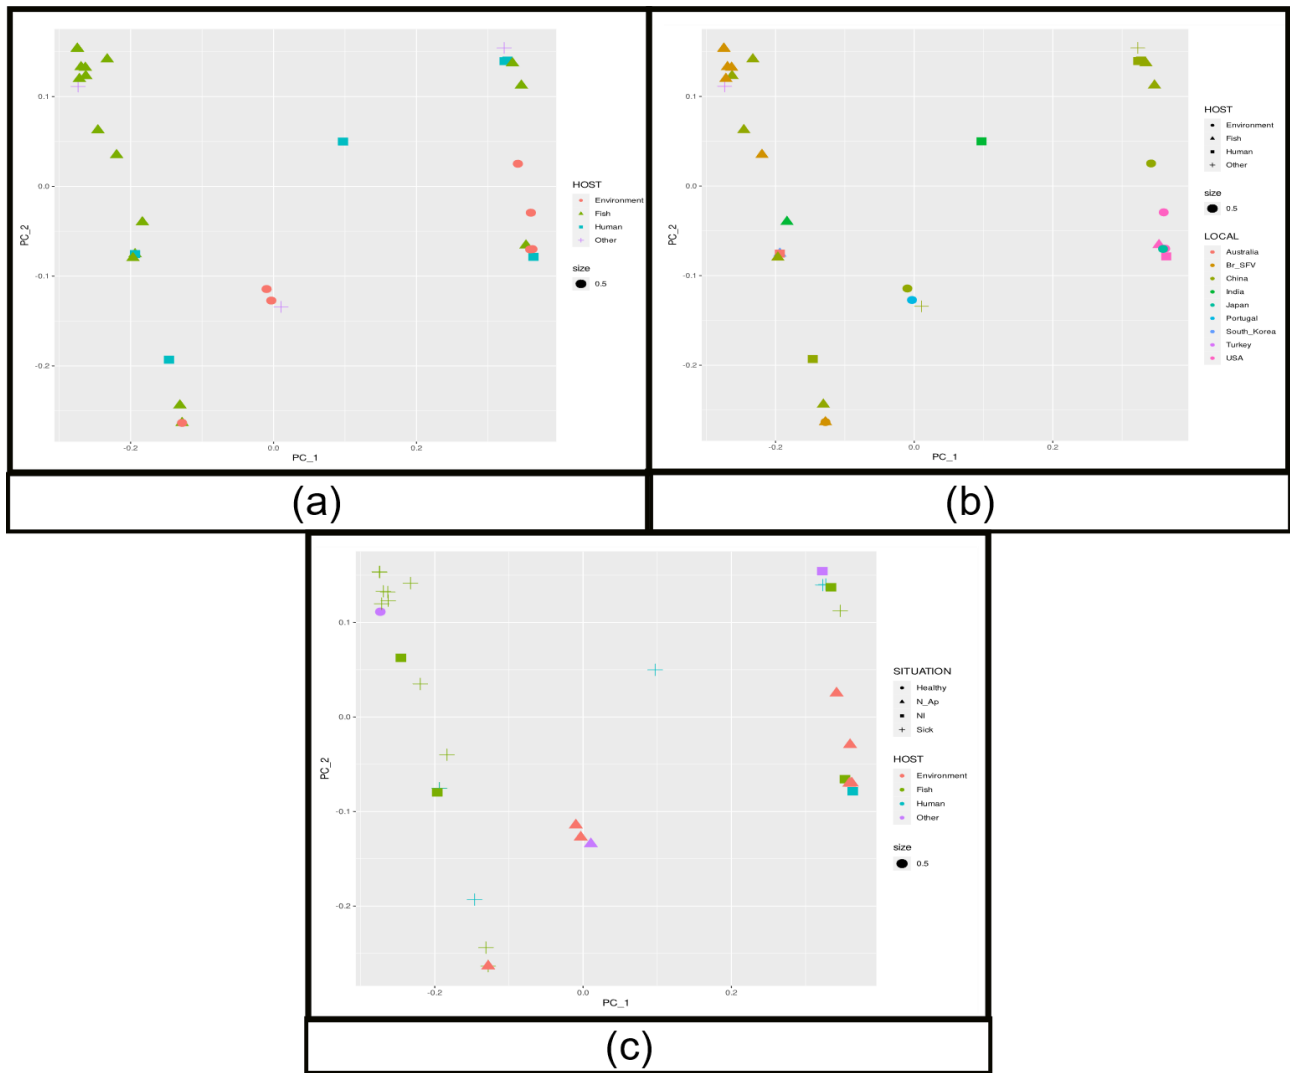

**Figure S7:** PCOA from presence/absence of genes plotted as scatter. a) Shape and color according to source of isolation. b) Shapes according to Host and color according to location. c) Shapes according to health status information and colors according to type of isolation source. The figure was plotted using R (Available online: <https://cran.r-project.org/>, accessed on 3 January 2022) with the package ggplot2 (Available online: <https://ggplot2.tidyverse.org/>, accessed on 4 January 2022).

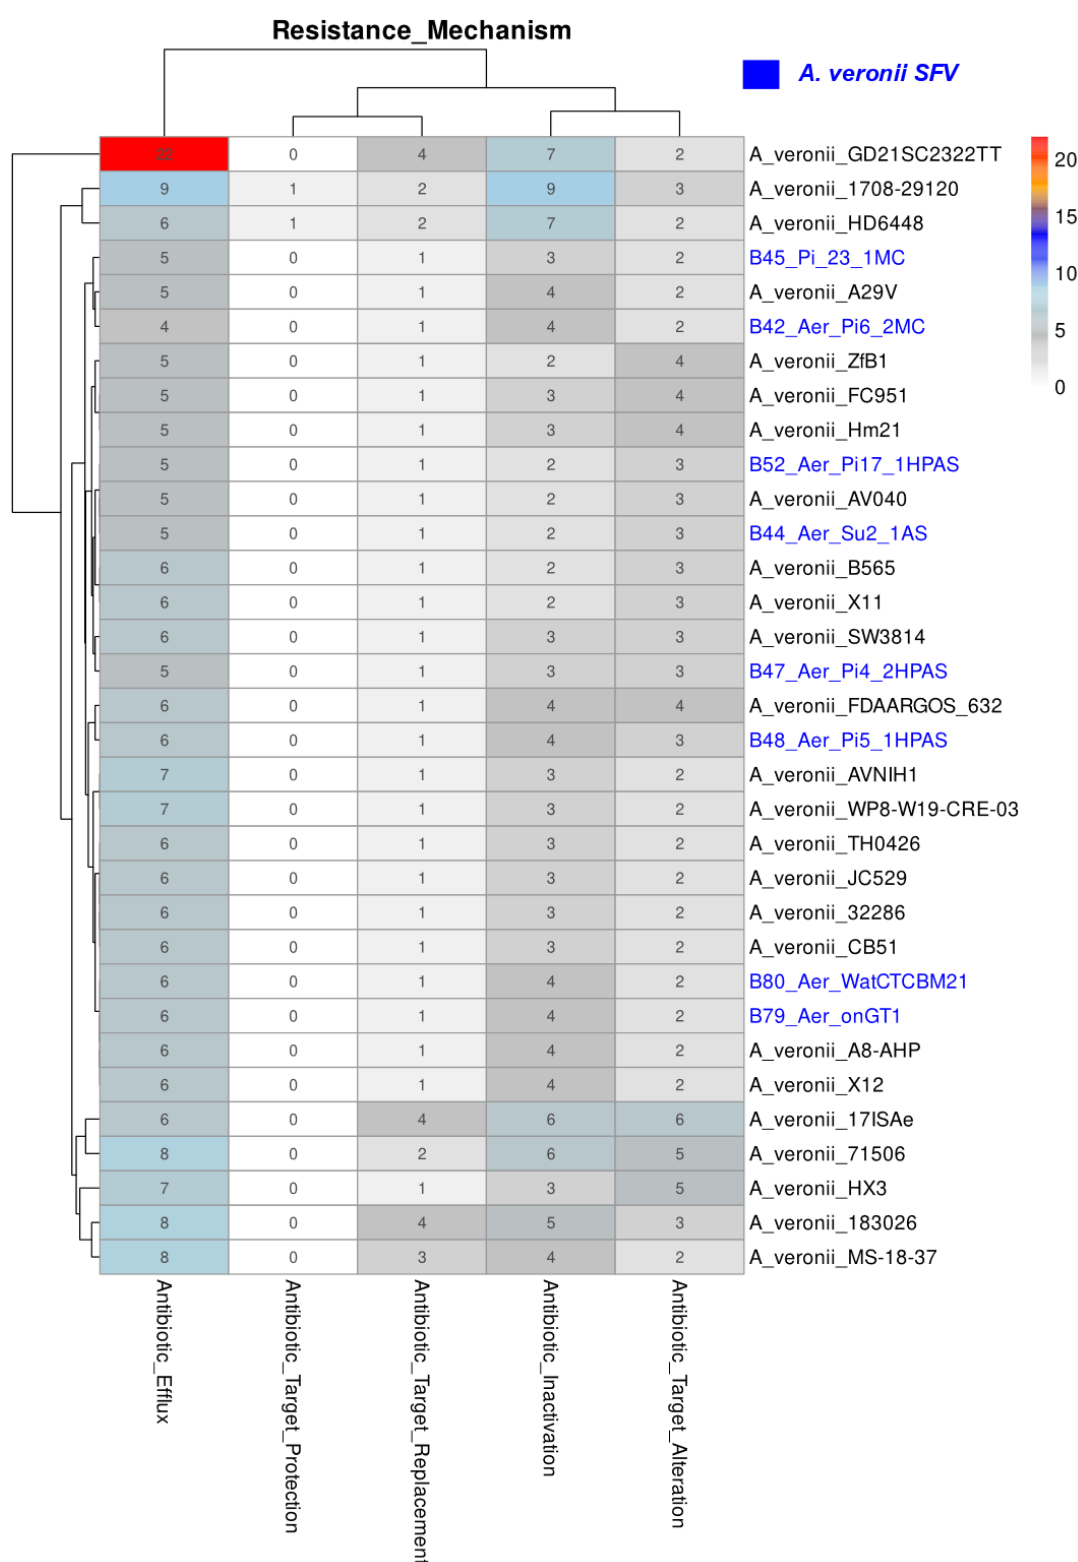

**Figure S8:** Amount of gene copies for each resistance mechanism in isolates. SFV isolates highlighted in blue. The figure was plotted using R (Available online: <https://cran.r-project.org/>, accessed on 3 January 2022) with the package Pheatmap (Available online: <https://www.rdocumentation.org/packages/pheatmap/versions/1.0.12/topics/pheatmap>, accessed o 30 August 2022).



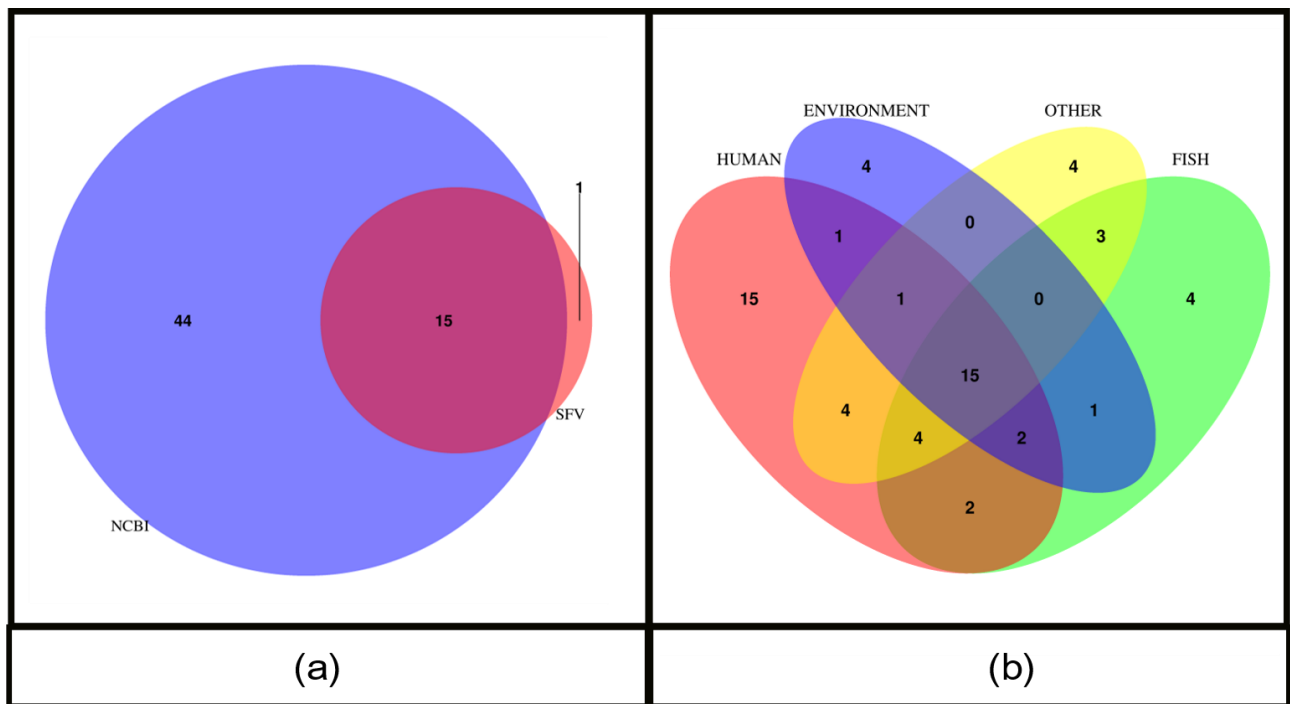

**Figure S9:** Venn Diagram illustrating the amount of antibiotic resistance-related genes shared between the SFV and NCBI isolates, as well as those that are unique to each group. The figure was plotted with the R language (Available online: <https://cran.r-project.org/>, accessed on 3 January 2022) using the VennDiagram package (Available online: <https://www.rdocumentation.org/packages/VennDiagram/versions/1.7.3/topics/venn.diagram>, accessed on 23 August 2022).



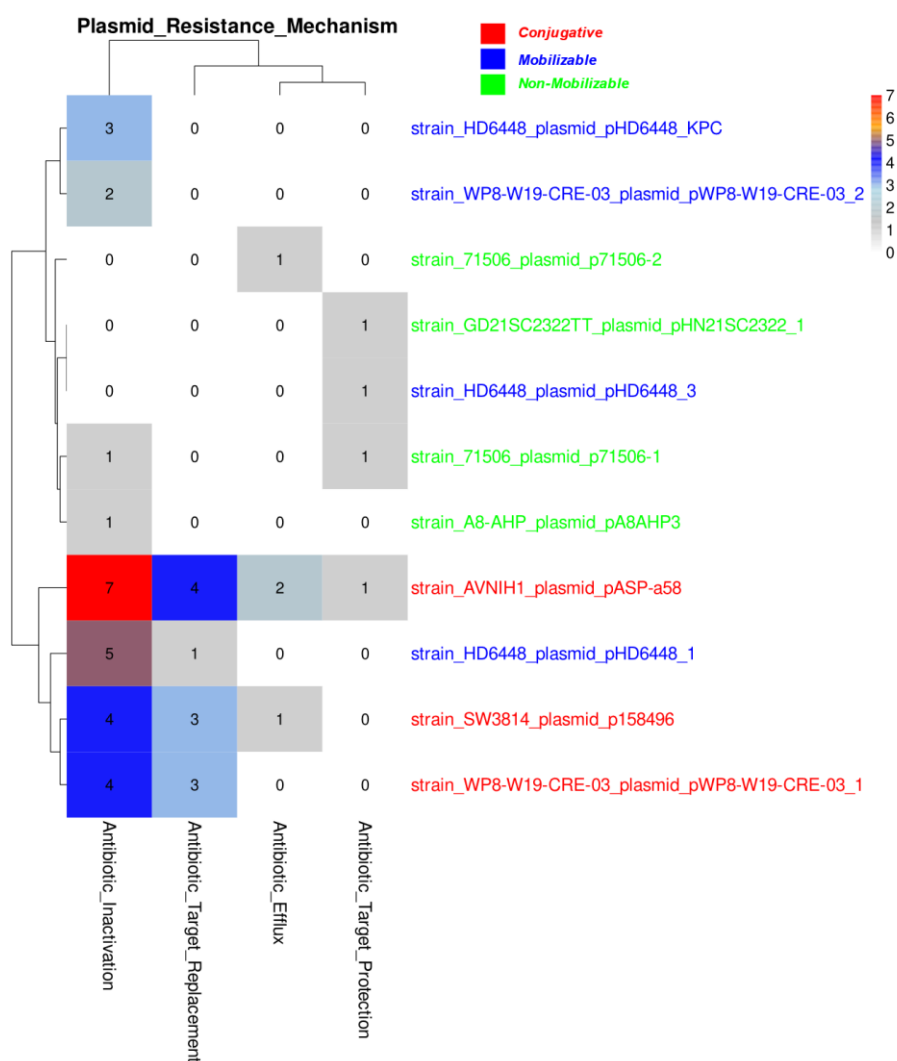

**Figure S11:** Number of genes present for each resistance mechanism in plasmids. Conjugative plasmids in red; mobilizable plasmids in blue; and unmobilizable plasmids in green. The figure was plotted using R (Available online: <https://cran.r-project.org/>, accessed on 3 January 2022) with the package **Pheatmap** (Available online: <https://www.rdocumentation.org/packages/pheatmap/versions/1.0.12/topics/pheatmap>, accessed o 30 August 2022).

**Table S1:** Result of mlst typing.

| Genome          | Genus     | ST   | Alele1     | Alele2     | Alele3     | Alele4     | Alele5     | Alele6     |
|-----------------|-----------|------|------------|------------|------------|------------|------------|------------|
| 1708-29120      | Aeromonas | -    | gyrB(~724) | groL(~225) | gltA(86)   | metG(~748) | ppsA(~906) | recA(~840) |
| 17ISAe          | Aeromonas | 485  | gyrB(126)  | groL(154)  | gltA(354)  | metG(16)   | ppsA(353)  | recA(374)  |
| 183026          | Aeromonas | -    | gyrB(~128) | groL(217)  | gltA(143)  | metG(679)  | ppsA(~155) | recA(~146) |
| 32286           | Aeromonas | -    | gyrB(~598) | groL(~591) | gltA(~802) | metG(785)  | ppsA(686)  | recA(~383) |
| 71506           | Aeromonas | -    | gyrB(445)  | groL(539)  | gltA(453)  | metG(~684) | ppsA(628)  | recA(724)  |
| A29V            | Aeromonas | -    | gyrB(126)  | groL(154)  | gltA(354)  | metG(~766) | ppsA(~65)  | recA(374)  |
| A8-AHP          | Aeromonas | -    | gyrB(281)  | groL(687)  | gltA(~86)  | metG(~226) | ppsA(~682) | recA(~805) |
| AV040           | Aeromonas | -    | gyrB(743)  | groL(541)  | gltA(302)  | metG(~818) | ppsA(124)  | recA(822)  |
| AVNIH1          | Aeromonas | 333  | gyrB(66)   | groL(71)   | gltA(255)  | metG(175)  | ppsA(124)  | recA(255)  |
| B565            | Aeromonas | 166  | gyrB(19)   | groL(18)   | gltA(19)   | metG(18)   | ppsA(17)   | recA(18)   |
| CB51            | Aeromonas | -    | gyrB(599)  | groL(556)  | gltA(127)  | metG(612)  | ppsA(810)  | recA(378)  |
| FC951           | Aeromonas | 515  | gyrB(377)  | groL(313)  | gltA(380)  | metG(371)  | ppsA(411)  | recA(404)  |
| FDAARGOS_632    | Aeromonas | -    | gyrB(66)   | groL(71)   | gltA(~350) | metG(~817) | ppsA(~511) | recA(223)  |
| GD21SC2322TT    | Aeromonas | -    | gyrB(224)  | groL(~73)  | gltA(222)  | metG(226)  | ppsA(114)  | recA(115)  |
| HD6448          | Aeromonas | 1000 | gyrB(724)  | groL(457)  | gltA(732)  | metG(175)  | ppsA(384)  | recA(362)  |
| Hm21            | Aeromonas | -    | gyrB(38)   | groL(~661) | gltA(467)  | metG(~677) | ppsA(511?) | recA(~799) |
| HX3             | Aeromonas | -    | gyrB(220)  | groL(226)  | gltA(802)  | metG(~684) | ppsA(388)  | recA(854)  |
| JC529           | Aeromonas | 160  | gyrB(136)  | groL(141)  | gltA(142)  | metG(141)  | ppsA(146)  | recA(117)  |
| MS-18-37        | Aeromonas | 254  | gyrB(212)  | groL(216)  | gltA(151)  | metG(213)  | ppsA(84)   | recA(220)  |
| SW3814          | Aeromonas | -    | gyrB(130?) | groL(~700) | gltA(~203) | metG(~136) | ppsA(~133) | recA(~532) |
| TH0426          | Aeromonas | -    | gyrB(29)   | groL(28)   | gltA(17)   | metG(840)  | ppsA(26)   | recA(28)   |
| WP2-S18-CRE-03  | Aeromonas | -    | gyrB(~433) | groL(~423) | gltA(~639) | metG(~483) | ppsA(~724) | recA(823)  |
| WP3-W19-ESBL-03 | Aeromonas | -    | gyrB(803)  | groL(175)  | gltA(54)   | metG(~362) | ppsA(895)  | recA(175)  |
| WP8-S18-ESBL-11 | Aeromonas | -    | gyrB(~14)  | groL(~740) | gltA(103)  | metG(~317) | ppsA(~395) | recA(~871) |
| WP8-W19-CRE-03  | Aeromonas | -    | gyrB(66)   | groL(71)   | gltA(303)  | metG(175)  | ppsA(389)  | recA(255)  |
| WP9-W18-ESBL-04 | Aeromonas | -    | gyrB(100)  | groL(~110) | gltA(173)  | metG(172)  | ppsA(~181) | recA(~840) |
| X11             | Aeromonas | -    | gyrB(479)  | groL(221)  | gltA(358)  | metG(227)  | ppsA(~859) | recA(53)   |
| X12             | Aeromonas | -    | gyrB(466)  | groL(~684) | gltA(56)   | metG(~744) | ppsA(~869) | recA(~357) |
| ZfB1            | Aeromonas | -    | gyrB(407)  | groL(480)  | gltA(526)  | metG(517)  | ppsA(561)  | recA(70)   |
| B42_Aer_Pi6_2MC | Aeromonas | -    | gyrB(~655) | groL(~702) | gltA(823?) | metG(~735) | ppsA(~655) | recA(~240) |
| B44_Aer_Su2_1AS | Aeromonas | -    | gyrB(~813) | groL(~202) | gltA(613)  | metG(~432) | ppsA(465)  | recA(629)  |
| B45_Pi_23_1MC   | Aeromonas | -    | gyrB(638)  | groL(319)  | gltA(32)   | metG(129)  | ppsA(651)  | recA(~380) |

|                    |           |   |                                |            |            |                                |
|--------------------|-----------|---|--------------------------------|------------|------------|--------------------------------|
| B47_Aer_Pi4_2HPAS  | Aeromonas | - | gyrB(~762)groL(~202)gltA(~225) | metG(416)  | ppsA(72)   | recA(~850)                     |
| B48_Aer_Pi5_1HPAS  | Aeromonas | - | gyrB(~433)groL(~591)gltA(110)  | metG(~586) | ppsA(~644) | recA(~240)                     |
| B52_Aer_Pi17_1HPAS | Aeromonas | - | gyrB(~813)groL(~202)gltA(613)  | metG(~432) | ppsA(465)  | recA(629)                      |
| B79_Aer_onGT1      | Aeromonas | - | gyrB(553)                      | groL(~702) | gltA(319)  | metG(~112)ppsA(~229)recA(~404) |
| B80_Aer_WatCTCBM21 | Aeromonas | - | gyrB(553)                      | groL(~702) | gltA(319)  | metG(~112)ppsA(~229)recA(~404) |
| MM_B02             | Aeromonas | - | gyrB(376)                      | groL(302)  | gltA(~812) | metG(504) ppsA(100) recA(~583) |

---

ST: Sequence Type.

**Table S2:** *A. veronii* genomes downloaded from NCBI.

| Genome          | Host                                   | Geral Location | Specific Location | Host Status              | Plasmids |
|-----------------|----------------------------------------|----------------|-------------------|--------------------------|----------|
| A8-AHP          | <i>Labeo rohita</i> (Fish)             | India          | Punjab            | Diseased                 | 3        |
| CB51            | Grass Carp (Fish)                      | China          | Hubei             | Blood                    | 0        |
| WP9-W18-ESBL-04 | WWTP (Environment)                     | Japan          | Tóquio            | Environment              | 4        |
| X12             | <i>Megalobrama amblycephala</i> (Fish) | China          | Hubei             | Cell Culture             | 0        |
| AVNIH1          | human-associated habitat (Environment) | USA            | Bethesda          | human-associated habitat | 1        |
| ZfB1            | Fish                                   | China          | Hubei             | -                        | 0        |
| GD21SC2322TT    | Plants                                 | China          | Guangdong         | Plants                   | 1        |
| SW3814          | Lake Water (Environment)               | USA            | California        | Environment              | 2        |
| MS-18-37        | Catfish (Fish)                         | USA            | Mississippi       | -                        | 0        |
| FC951           | <i>Homo sapiens</i> (Human)            | India          | Vellore           | Diarrhea                 | 1        |
| 71506           | <i>Homo sapiens</i> (Human)            | China          | Ningbo            | Cholecystitis            | 2        |
| 17ISAe          | <i>Discus</i> (Fish)                   | South Korea    | -                 | Spleen                   | 1        |
| HX3             | Alligator (Reptile)                    | China          | -                 | -                        | 1        |
| 183026          | <i>Homo sapiens</i> (Human)            | China          | Hubei             | Septicemia               | 0        |
| WP8-W19-CRE-03  | WWTP (Environment)                     | Japan          | Tóquio            | Environment              | 5        |
| A29V            | <i>Homo sapiens</i> (Human)            | Australia      | -                 | Gastroenteritis          | 2        |
| AV040           | Fish                                   | China          | Hefei             | Liver-Spleen             | 0        |
| 1708-29120      | <i>Homo sapiens</i> (Human)            | China          | Beijing           | Cholangiolithiasis       | 0        |
| X11             | <i>Megalobrama amblycephala</i> (Fish) | China          | Hubei             | -                        | 0        |
| HD6448          | Hospital Sewage (Environment)          | China          | Suzhou            | Environment              | 5        |
| 32286           | Waste Water (Environment)              | Portugal       | Lisboa            | Environment              | 0        |
| WP3-W19-ESBL-03 | WWTP (Environment)                     | Japan          | Tóquio            | Effluent                 | 5        |
| TH0426          | <i>Tachysurus fulvidraco</i> (Fish)    | China          | Zongguan          | -                        | 0        |
| FDAARGOS_632    | <i>Homo sapiens</i> (Human)            | USA            | -                 | -                        | 1        |
| WP8-S18-ESBL-11 | WWTP (Environment)                     | Japan          | Tóquio            | Effluent                 | 3        |
| JC529           | Carp (Fish)                            | China          | Jilin             | Sepsis                   | 0        |
| WP2-S18-CRE-03  | WWTP (Environment)                     | Japan          | Tóquio            | Effluent                 | 3        |
| B565            | Lake Sediment (Environment)            | China          | -                 | -                        | 0        |
| Hm21            | <i>Hirudo verbana</i> (Annelid)        | Türkiye        | -                 | Healthy Digestive Tract  | 1        |

**Table S3:** Reference genomes of species of the genus *Aeromonas* downloaded from NCBI.

| Species                                | Genome                | Assembly        |
|----------------------------------------|-----------------------|-----------------|
| <i>Aeromonas allosaccharophila</i>     | FDAARGOS_933          | GCA_016026615.1 |
| <i>Aeromonas popoffii</i>              | CIP_105493            | GCF_000820025.1 |
| <i>Aeromonas bestiarum</i>             | GA97-22               | GCF_002906925.1 |
| <i>Aeromonas dhakensis</i>             | KOR1                  | GCA_001306015.1 |
| <i>Aeromonas bivalvium</i>             | ZJ19-2                | GCA_003265465.1 |
| <i>Aeromonas fluvialis</i>             | LMG_24681             | GCF_000819885.1 |
| <i>Aeromonas finlandensis</i>          | 4287D                 | GCA_000764645.1 |
| <i>Aeromonas sobria</i>                | CECT_4245             | GCA_000820145.1 |
| <i>Aeromonas eucrenophila</i>          | CECT_4224             | GCF_000819865.1 |
| <i>Aeromonas salmonicida</i>           | SRW-OG1               | GCF_012931585.1 |
| <i>Aeromonas enteropelogenes</i>       | 1999lcr               | GCA_000687355.2 |
| <i>Aeromonas piscicola</i>             | LMG_24783             | GCA_000820005.1 |
| <i>Aeromonas aquatica</i>              | AE235                 | GCF_000764655.1 |
| <i>Aeromonas diversa</i>               | CDC_2478-85_CECT_4254 | GCF_000819805.1 |
| <i>Aeromonas lacus</i>                 | AE122                 | GCA_000764665.1 |
| <i>Aeromonas tecta</i>                 | CECT_7082             | GCA_000820185.2 |
| <i>Aeromonas cavernicola</i>           | DSM_24474             | GCA_002795305.1 |
| <i>Aeromonas simiae</i>                | A6                    | GCA_014892695.1 |
| <i>Aeromonas caviae</i>                | FDAARGOS_75           | GCF_000783715.2 |
| <i>Aeromonas media</i>                 | WS                    | GCF_000287215.2 |
| <i>Aeromonas molluscorum</i>           | 848                   | GCF_000388115.1 |
| <i>Aeromonas taiwanensis</i>           | LMG_24683             | GCF_000699185.1 |
| <i>Aeromonas rivuli</i>                | DSM_22539             | GCF_000820045.1 |
| <i>Aeromonas jandaei</i>               | Riv2                  | GCA_000708125.1 |
| <i>Aeromonas encheleia</i>             | NCTC12917             | GCA_900637545.1 |
| <i>Aeromonas hydrophila hydrophila</i> | ATCC_7966             | GCF_000014805.1 |
| <i>Aeromonas australiensis</i>         | CECT_8023             | GCF_000819725.1 |
| <i>Aeromonas rivipollensis</i>         | G78                   | GCF_010974825.1 |
| <i>Aeromonas sanarellii</i>            | LMG_24682             | GCA_000820085.1 |
| <i>Aeromonas lusitana</i>              | MDC_2473              | GCA_002812985.1 |

**Table S4:** Additional reference genomes included in the core genome phylogeny.

| Species                            | Genome        | Assembly        |
|------------------------------------|---------------|-----------------|
| <i>Aeromonas dhakensis</i>         | KN-Mc-6U21    | GCA_002285935.1 |
| <i>Aeromonas dhakensis</i>         | b2-100        | GCA_023920205.1 |
| <i>Aeromonas dhakensis</i>         | Aer_OnF1      | GCA_022703095.1 |
| <i>Aeromonas jandaei</i>           | 4608          | GCF_018802325.1 |
| <i>Aeromonas jandaei</i>           | FDAARGOS 986  | GCF_016127195.1 |
| <i>Aeromonas jandaei</i>           | 3299          | GCF_014217505.1 |
| <i>Aeromonas allosaccharophila</i> | FDAARGOS_933* | GCA_016026615.1 |

\*Same genome as Table S2.



**Table S5:** Putative plasmids identified in SFV (São Francisco Valley) isolates.

| Genome             | Plasmid | Mobility        | Size (bp) | Circularized | mash_neighbor_identification |
|--------------------|---------|-----------------|-----------|--------------|------------------------------|
| B44_Aer_Su2_1AS    | AD562   | Non-mobilizable | 4831      | Yes          | <i>Aeromonas salmonicida</i> |
| B52_Aer_Pi17_1HPAS | AD562   | Non-mobilizable | 4831      | Yes          | <i>Aeromonas salmonicida</i> |
| B45_Pi_23_1MC      | AD562   | Non-mobilizable | 4827      | Yes          | <i>Aeromonas salmonicida</i> |
| B45_Pi_23_1MC      | AE566   | Conjugative     | 144051    | No           | <i>Aeromonas hydrophila</i>  |

**Table S6:** Information on plasmids associated with isolates downloaded from NCBI.

| PLASMIDS                     | STRAIN       | MOBILITY        | MASH_NEIGHBOR_IDENTIFICATION                    | RESISTANCE_GENES* |
|------------------------------|--------------|-----------------|-------------------------------------------------|-------------------|
| 17ISAE_p_p17ISAE             | 17ISAE       | non-mobilizable | <i>Aeromonas veronii</i>                        | -                 |
| 71506_p_p71506-1             | 71506        | non-mobilizable | <i>Aeromonas caviae</i>                         | 2                 |
| 71506_p_p71506-2             | 71506        | non-mobilizable | <i>Aeromonas salmonicida subsp. salmonicida</i> | 1                 |
| A29V_p_pAV1K                 | A29V         | non-mobilizable | <i>Aeromonas caviae</i>                         | -                 |
| A29V_p_pAV7K                 | A29V         | non-mobilizable | <i>Aeromonas veronii</i>                        | -                 |
| A8-AHP_p_pA8AHP1             | A8-AHP       | non-mobilizable | <i>Serratia marcescens</i>                      | -                 |
| A8-AHP_p_pA8AHP2             | A8-AHP       | non-mobilizable | <i>Aeromonas salmonicida</i>                    | -                 |
| A8-AHP_p_pA8AHP3             | A8-AHP       | mobilizable     | <i>Mucilaginibacter sp. PAMC 26640</i>          | 1                 |
| AVNIH1_p_pASP-a58            | AVNIH1       | conjugative     | <i>Aeromonas veronii</i>                        | 14                |
| FC951_p_unnamed              | FC951        | non-mobilizable | <i>Aeromonas veronii</i>                        | -                 |
| FDAARGOS_632_p_unnamed1      | FDAARGOS_632 | mobilizable     | <i>Aeromonas veronii</i>                        | -                 |
| GD21SC2322TT_p_pHN21SC2322_1 | GD21SC2322TT | non-mobilizable | <i>Aeromonas sp. ASNIH2</i>                     | 1                 |
| HD6448_p_pHD6448_1           | HD6448       | mobilizable     | <i>Aeromonas hydrophila subsp. hydrophila</i>   | 6                 |
| HD6448_p_pHD6448_3           | HD6448       | mobilizable     | <i>Enterobacter kobei</i>                       | 1                 |
| HD6448_p_pHD6448_4           | HD6448       | mobilizable     | <i>Aeromonas salmonicida subsp. salmonicida</i> | -                 |
| HD6448_p_pHD6448_5           | HD6448       | mobilizable     | <i>Aeromonas hydrophila</i>                     | -                 |
| HD6448_p_pHD6448_KPC         | HD6448       | mobilizable     | <i>Pseudomonas aeruginosa</i>                   | 3                 |
| Hm21_p_pHm21                 | Hm21         | non-mobilizable | <i>Pantoea sp. PSNIH1</i>                       | -                 |
| HX3_p_pHX3                   | HX3          | conjugative     | <i>Aeromonas hydrophila</i>                     | -                 |

|                                    |                |                 |                                                                |   |
|------------------------------------|----------------|-----------------|----------------------------------------------------------------|---|
| SW3814_p_p158496                   | SW3814         | conjugative     | <i>Aeromonas hydrophila</i>                                    | 8 |
| SW3814_p_p1739                     | SW3814         | non-mobilizable | <i>Aeromonas caviae</i>                                        | - |
| WP8-W19-CRE-03_p_pWP8-W19-CRE-03_1 | WP8-W19-CRE-03 | conjugative     | <i>Aeromonas caviae</i>                                        | 7 |
| WP8-W19-CRE-03_p_pWP8-W19-CRE-03_2 | WP8-W19-CRE-03 | mobilizable     | <i>Aeromonas caviae</i>                                        | 2 |
| WP8-W19-CRE-03_p_pWP8-W19-CRE-03_3 | WP8-W19-CRE-03 | mobilizable     | -                                                              | - |
| WP8-W19-CRE-03_p_pWP8-W19-CRE-03_4 | WP8-W19-CRE-03 | mobilizable     | <i>Aeromonas salmonicida subsp. salmonicida</i><br><i>A449</i> | - |
| WP8-W19-CRE-03_p_pWP8-W19-CRE-03_5 | WP8-W19-CRE-03 | mobilizable     | <i>Aeromonas sp. ASNIH2</i>                                    | - |

---

\*Total amount.

**Table S7:** Assembly metrics of the genomes sequenced in this study.

| <b>Assembly</b>    | <b>Size (pb)</b> | <b>N50</b> | <b>GC (%)</b> | <b>Contigs</b> |
|--------------------|------------------|------------|---------------|----------------|
| B42_Aer_Pi6_2MC    | 4739098          | 323452     | 58.49         | 51             |
| B79_Aer_onGT1      | 4576072          | 232736     | 58.75         | 72             |
| B80_Aer_WatCTCBM21 | 4576144          | 253805     | 58.75         | 73             |
| B48_Aer_Pi5_1HPAS  | 4705169          | 177529     | 58.73         | 72             |
| B47_Aer_Pi4_2HPAS  | 4511905          | 249723     | 58.82         | 70             |
| B52_Aer_Pi17_1HPAS | 4559686          | 280995     | 58.62         | 73             |
| B45_Pi_23_1MC      | 4630809          | 208383     | 58.65         | 58             |
| B44_Aer_Su2_1AS    | 4559658          | 280995     | 58.62         | 76             |
| MM_B02             | 4702809          | 299827     | 61.81         | 78             |
